# Supplementary material for: Supramolecular engineering polyesters: endgroup functionalization of glycol modified PET with ureidopyrimidinone
Source: Royal Society of Chemistry journal article supplement (doi:10.1039/c6py01421f), 2016-01-01
Supplement: c6py01421f1.pdf [file c6py01421f1.pdf]

## Supplementary Information

Supramolecular Engineering Polyesters: Endgroup Functionalization of Glycol Modified PET  
with Ureidopyrimidinone

Katelyn R. Houston,<sup>†</sup> Anne-Martine S. Jackson,<sup>‡</sup> Ross W. Yost,<sup>‡</sup> Howard S. Carman,<sup>‡</sup> Valerie  
Sheares Ashby<sup>\*,†,§</sup>

<sup>†</sup>Department of Chemistry, University of North Carolina at Chapel Hill, North Carolina 27599,  
United States

<sup>‡</sup>Eastman Chemical Co., Kingsport, Tennessee 37660, United States

<sup>§</sup>Department of Chemistry, Duke University, Durham, North Carolina 27708, United States

## Table of Contents

|                                                                                    |    |
|------------------------------------------------------------------------------------|----|
| Chemical Structures and Synthetic Schemes:.....                                    | 3  |
| Properties of PETG and H-UPy functionalized PETG of Higher Molecular Weights:..... | 3  |
| <sup>1</sup> H NMR Spectra of Endgroups and Polymers:.....                         | 4  |
| ATR FT-IR Spectra: .....                                                           | 13 |
| TGA Curves:.....                                                                   | 14 |
| GPC Before and After Melt-Processing: .....                                        | 14 |
| Dynamic Oscillatory Shear Measurement of the Tan Delta: .....                      | 15 |
| AFM:.....                                                                          | 15 |
| Rheology:.....                                                                     | 16 |
| Variable Temperature <sup>1</sup> H NMR Spectra: .....                             | 17 |

## Chemical Structures and Synthetic Schemes:

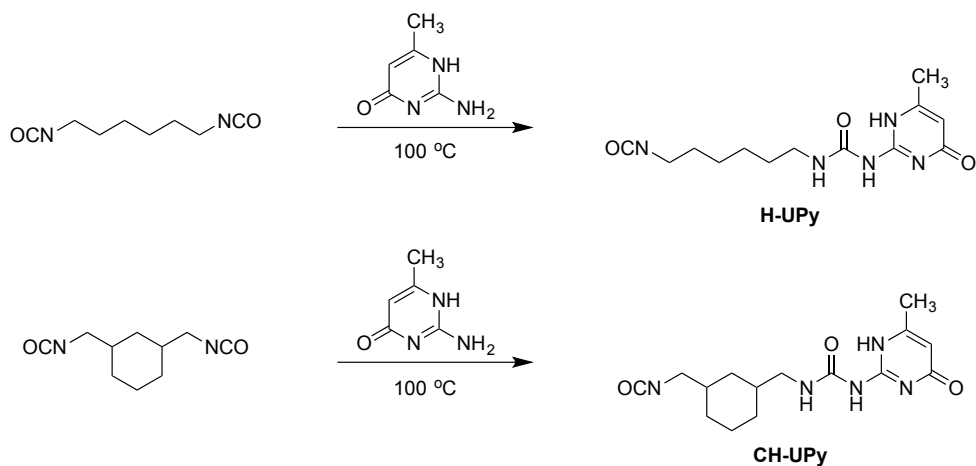

**Scheme S1.** Synthesis of endgroups H-UPy and CH-UPy

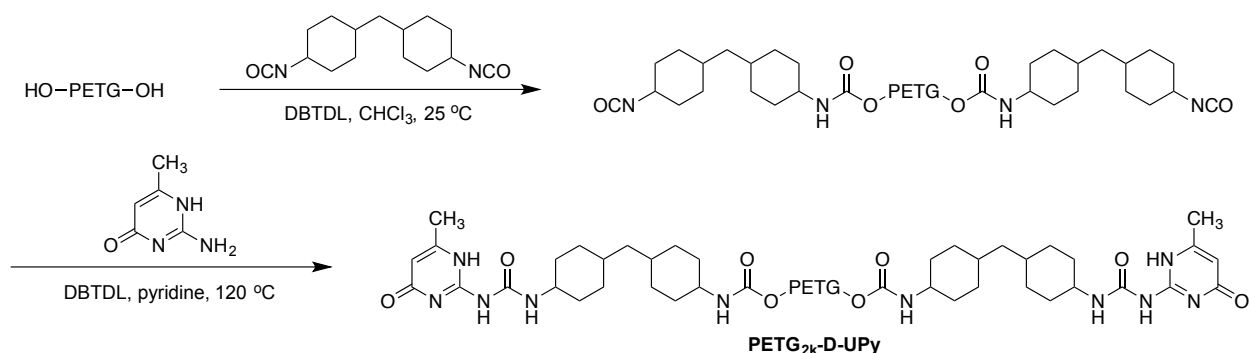

**Scheme S2.** One-pot synthesis of PETG<sub>2k</sub>-D-UPy

## Properties of PETG and H-UPy functionalized PETG of Higher Molecular Weights:

**Table S1.** Properties of PETG and H-UPy functionalized PETG of 3800 and 6800 g mol<sup>-1</sup>.

| Sample                      | $\langle M_n \rangle^a$<br>(g mol <sup>-1</sup> ) | $\langle M_w \rangle^a$<br>(g mol <sup>-1</sup> ) | $\bar{D}^a$ | 5% Degradation <sup>b</sup><br>(°C) | $T_g^c$<br>(°C) |
|-----------------------------|---------------------------------------------------|---------------------------------------------------|-------------|-------------------------------------|-----------------|
| PETG <sub>3.8k</sub>        | 6100                                              | 10000                                             | 1.7         | 387                                 | 58              |
| PETG <sub>3.8k</sub> -H-UPy | 10000                                             | 16000                                             | 1.6         | 360                                 | 71              |
| PETG <sub>6.8k</sub>        | 12000                                             | 21000                                             | 1.8         | 381                                 | 72              |
| PETG <sub>6.8k</sub> -H-UPy | 17000                                             | 27000                                             | 1.6         | 371                                 | 72              |

<sup>a</sup>Measured by GPC in CHCl<sub>3</sub> using polystyrene standards. <sup>b</sup>Measured by TGA. <sup>c</sup>Measured by DSC, mid-point of the second heat.

## $^1\text{H}$ NMR Spectra of Endgroups and Polymers:

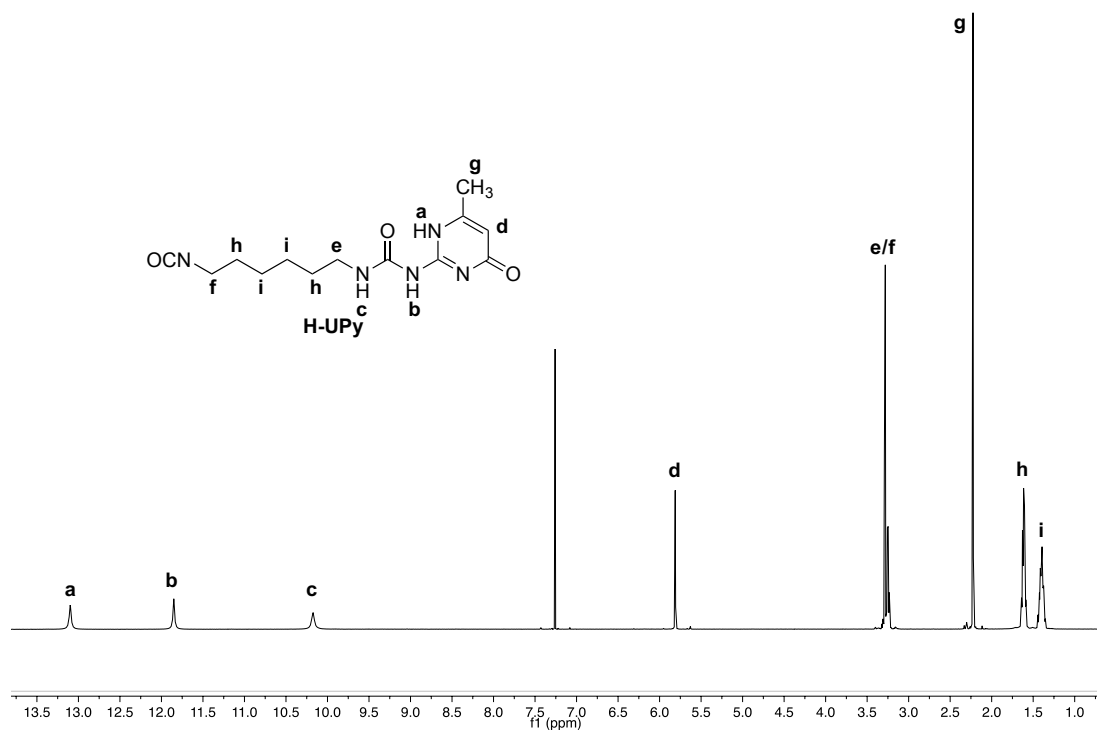

**Figure S1.**  $^1\text{H}$  NMR spectrum of H-UPy in  $\text{CDCl}_3$  at ambient temperature.  $^1\text{H}$  NMR (400 MHz,  $\text{CDCl}_3$ )  $\delta$ : 13.10 (s, 1H), 11.85 (s, 1H), 10.18 (s, 1H), 5.81 (s, 1H), 3.28 (t, 2H), 3.25 (t, 2H), 2.22 (s, 3H), 1.61 (m, 4H), 1.40 (m, 4H).

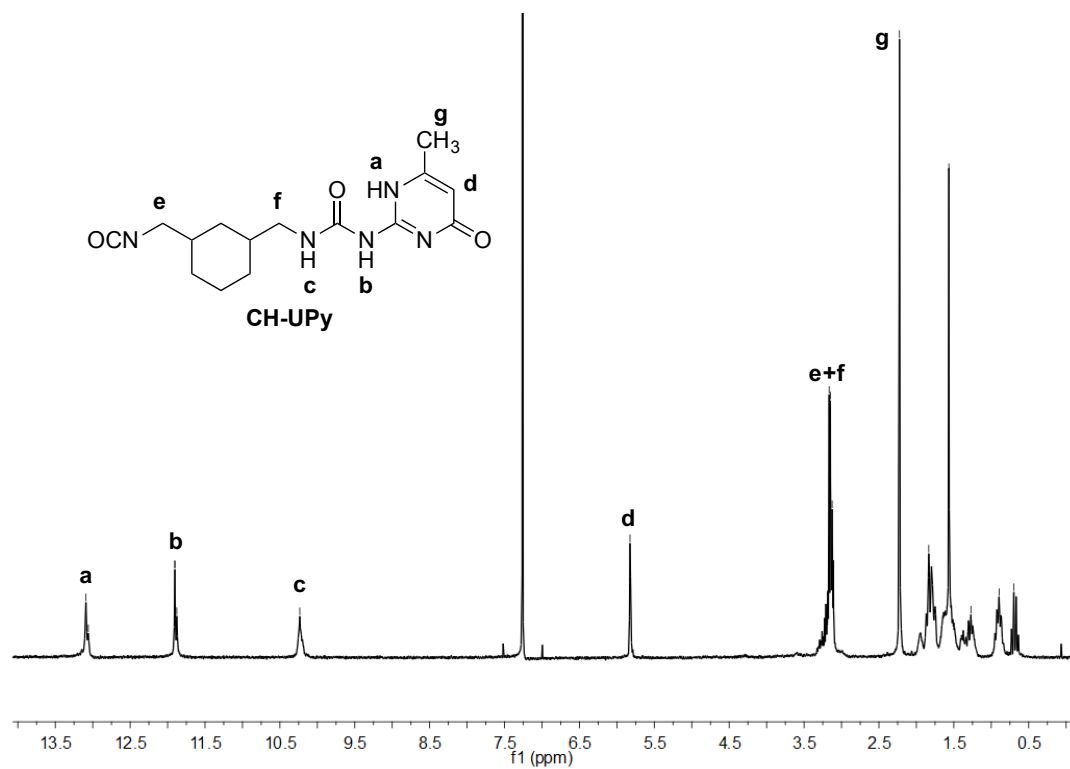

**Figure S2.** <sup>1</sup>H NMR spectrum of CH-UPy in CDCl<sub>3</sub> at ambient temperature.

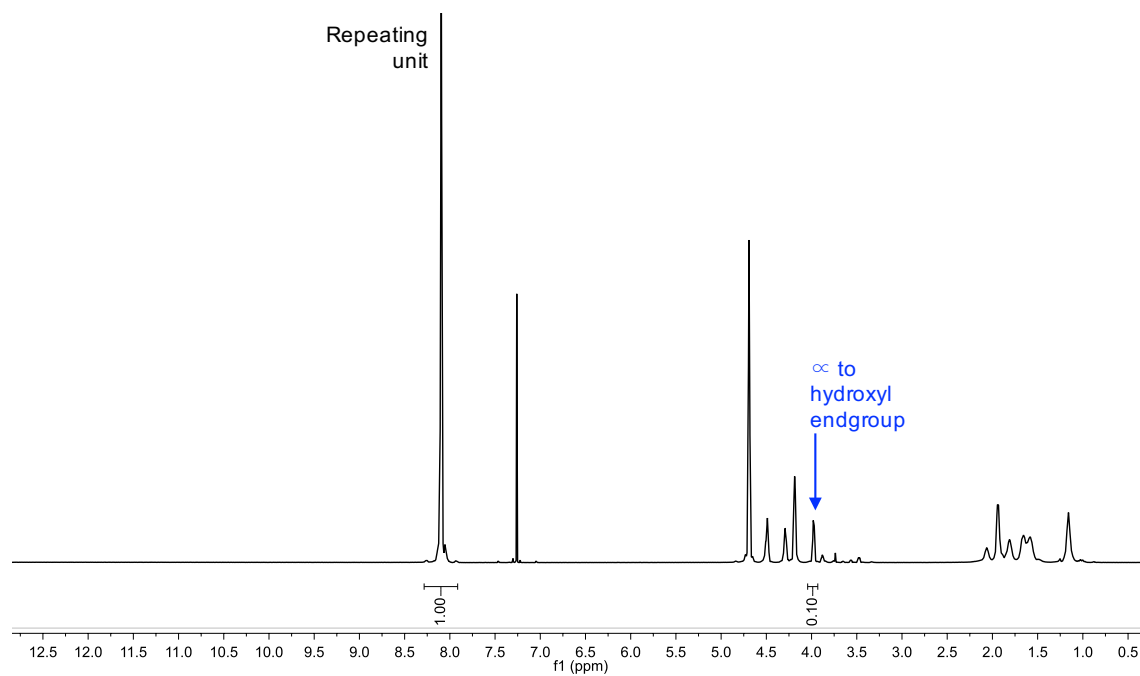

**Figure S3.**  $^1\text{H}$  NMR spectrum of PETG2k in  $\text{CDCl}_3$  at ambient temperature. The ratio of the integrals of the aromatic repeating unit (1.00) to the added integrals of the PETG peaks  $\infty$  hydroxyl endgroups (0.10) was taken to find  $X_n$ .

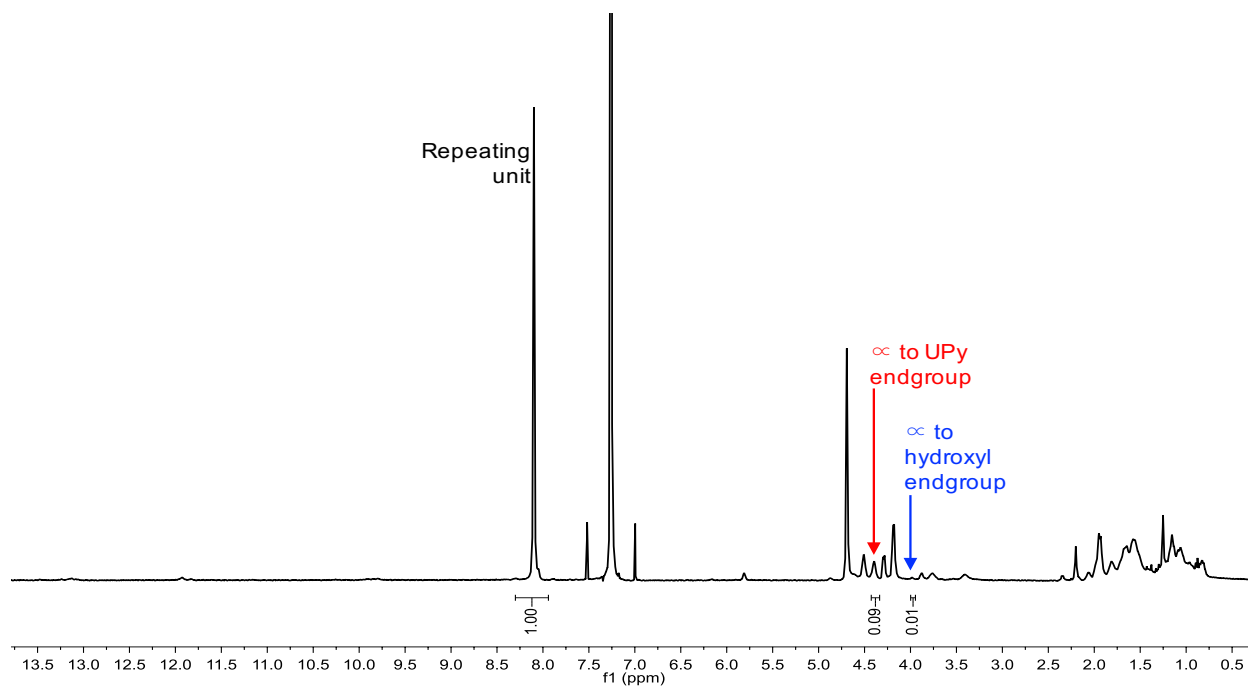

**Figure S4.**  $^1\text{H}$  NMR spectrum of PETG2k-D-UPy in  $\text{CDCl}_3$  at ambient temperature. The ratio of the integrals of the aromatic repeating unit (1.00) to the added integrals of the PETG peaks  $\infty$  to the UPy endgroups and  $\infty$  to existing hydroxyl endgroups (0.10) was taken to find  $X_n$ .

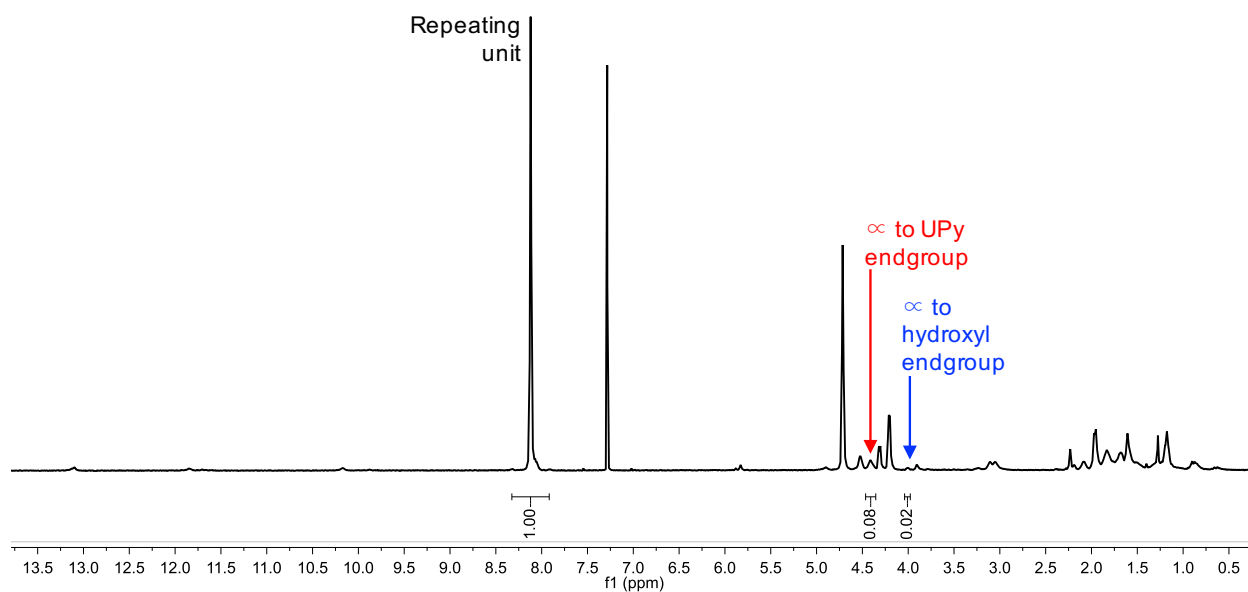

**Figure S5.**  $^1\text{H}$  NMR spectrum of  $\text{PETG}_{2k}\text{-CH-UPy}$  in  $\text{CDCl}_3$  at ambient temperature. The ratio of the integrals of the aromatic repeating unit (1.00) to the added integrals of the PETG peaks  $\propto$  to the UPy endgroups and  $\propto$  to existing hydroxyl endgroups (0.10) was taken to find  $X_n$ .



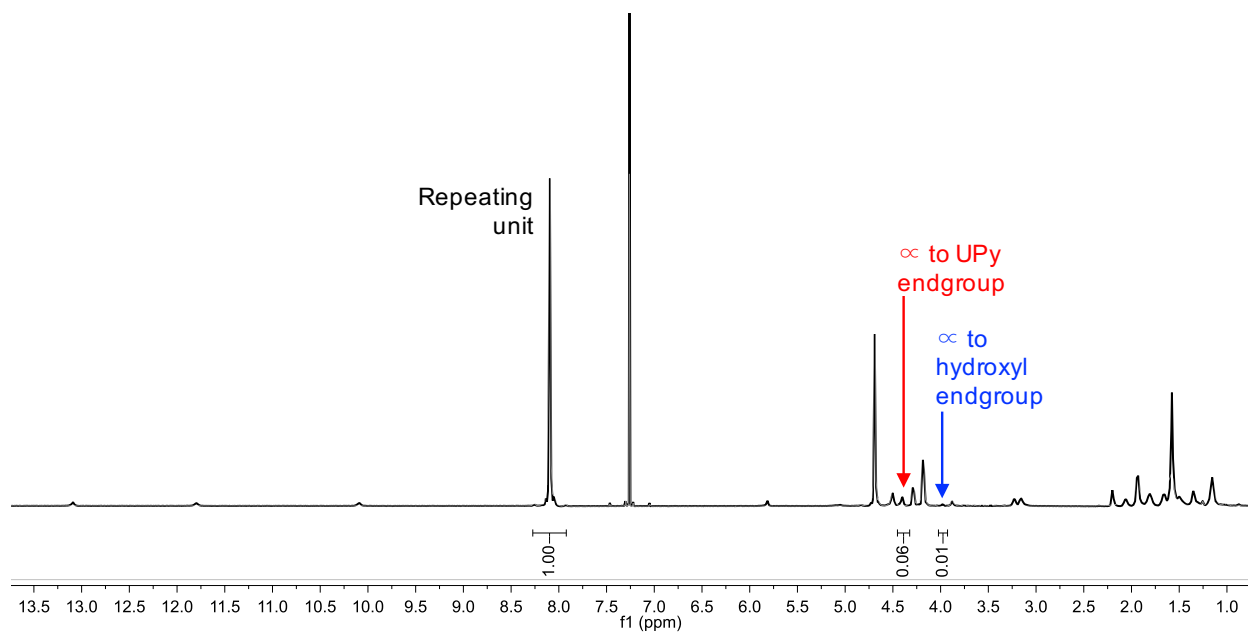

**Figure S6.**  $^1\text{H}$  NMR spectrum of PETG<sub>2k</sub>-H-UPy in CDCl<sub>3</sub> at ambient temperature. The ratio of the integrals of the aromatic repeating unit (1.00) to the added integrals of the PETG peaks  $\propto$  to the UPy endgroups and  $\propto$  to existing hydroxyl endgroups (0.07) was taken to find

$$X_n.$$

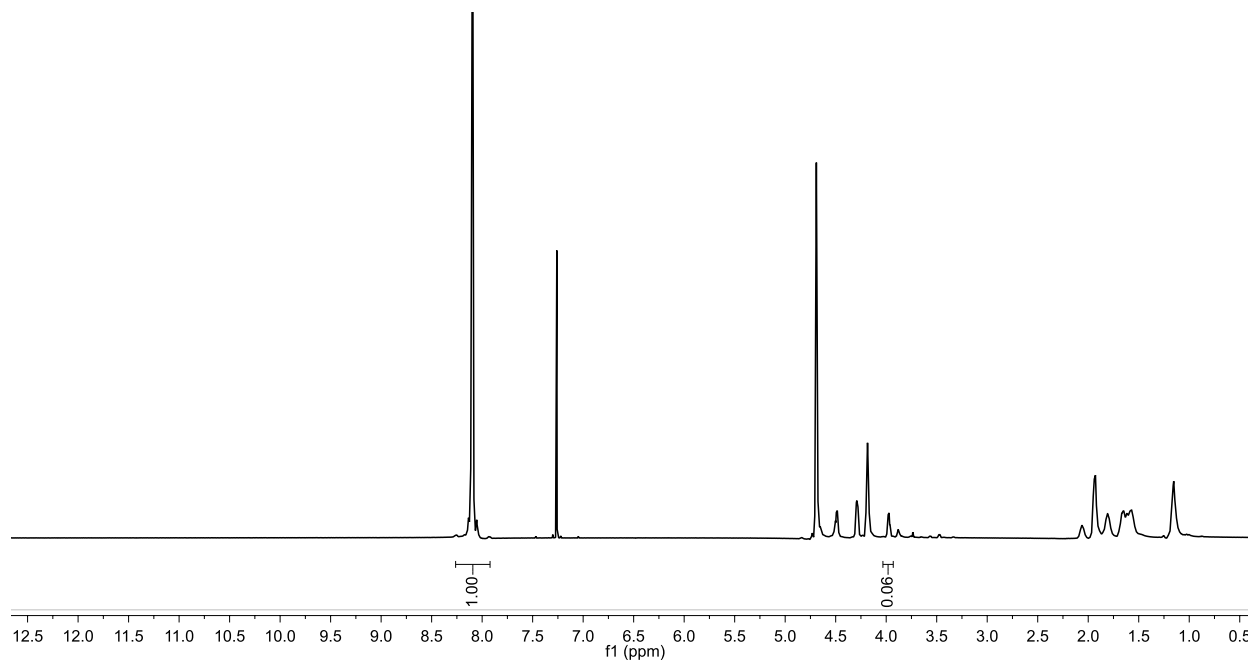

**Figure S7.**  $^1\text{H}$  NMR spectrum of PETG<sub>3.8k</sub> in CDCl<sub>3</sub> at ambient temperature.

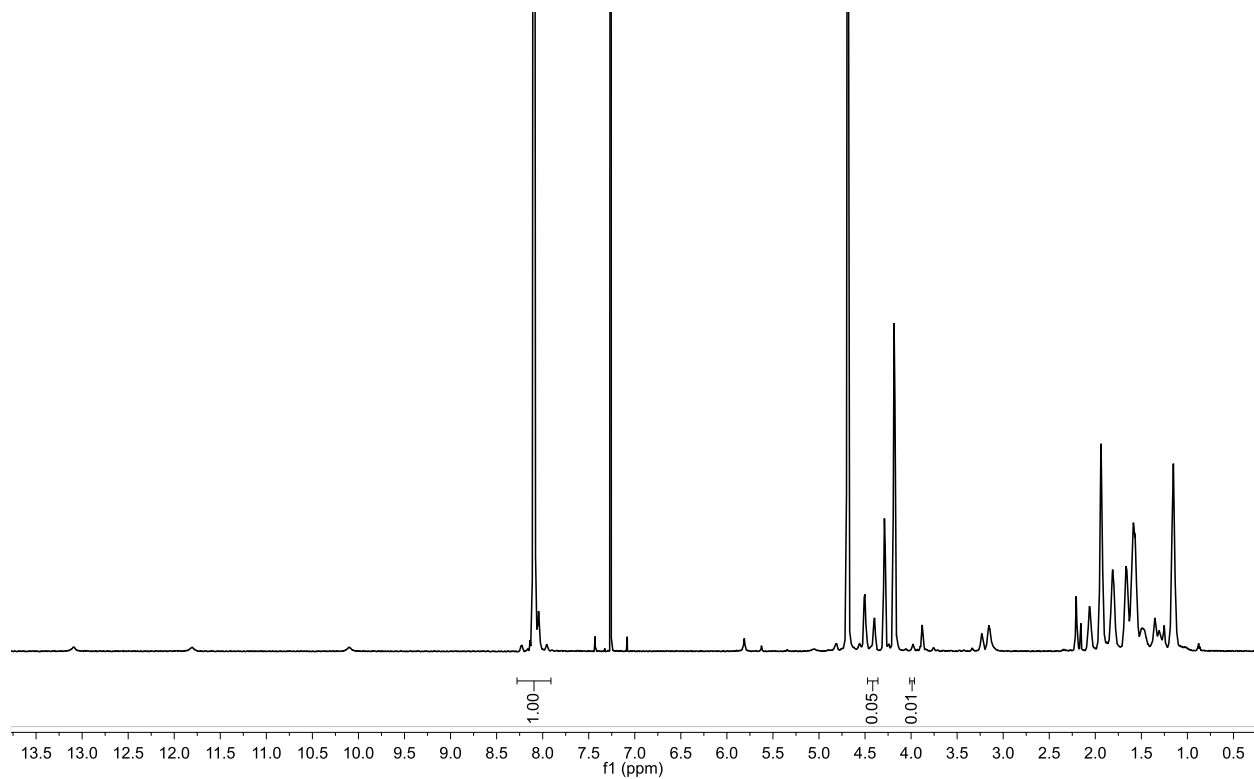

**Figure S8.**  $^1\text{H}$  NMR spectrum of PETG<sub>3.8k</sub>-H-UPy in  $\text{CDCl}_3$  at ambient temperature.

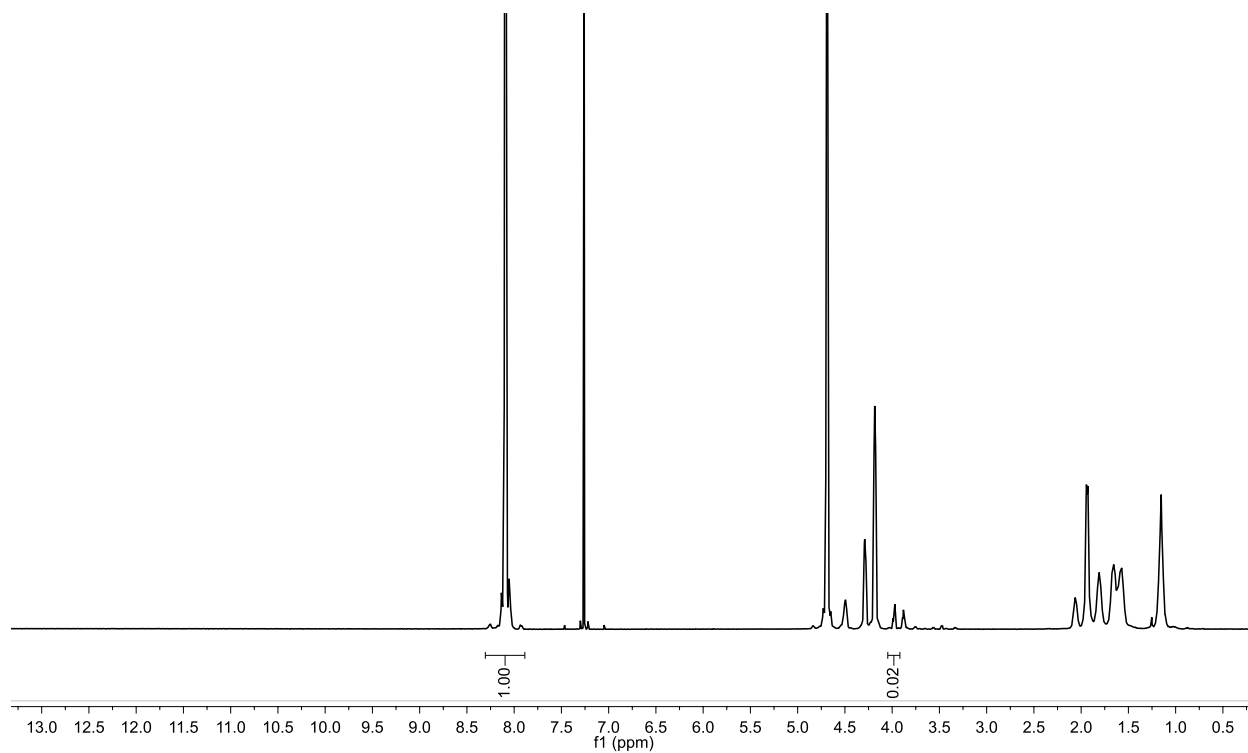

**Figure S9.**  $^1\text{H}$  NMR spectrum of PETG<sub>6.8k</sub> in  $\text{CDCl}_3$  at ambient temperature.

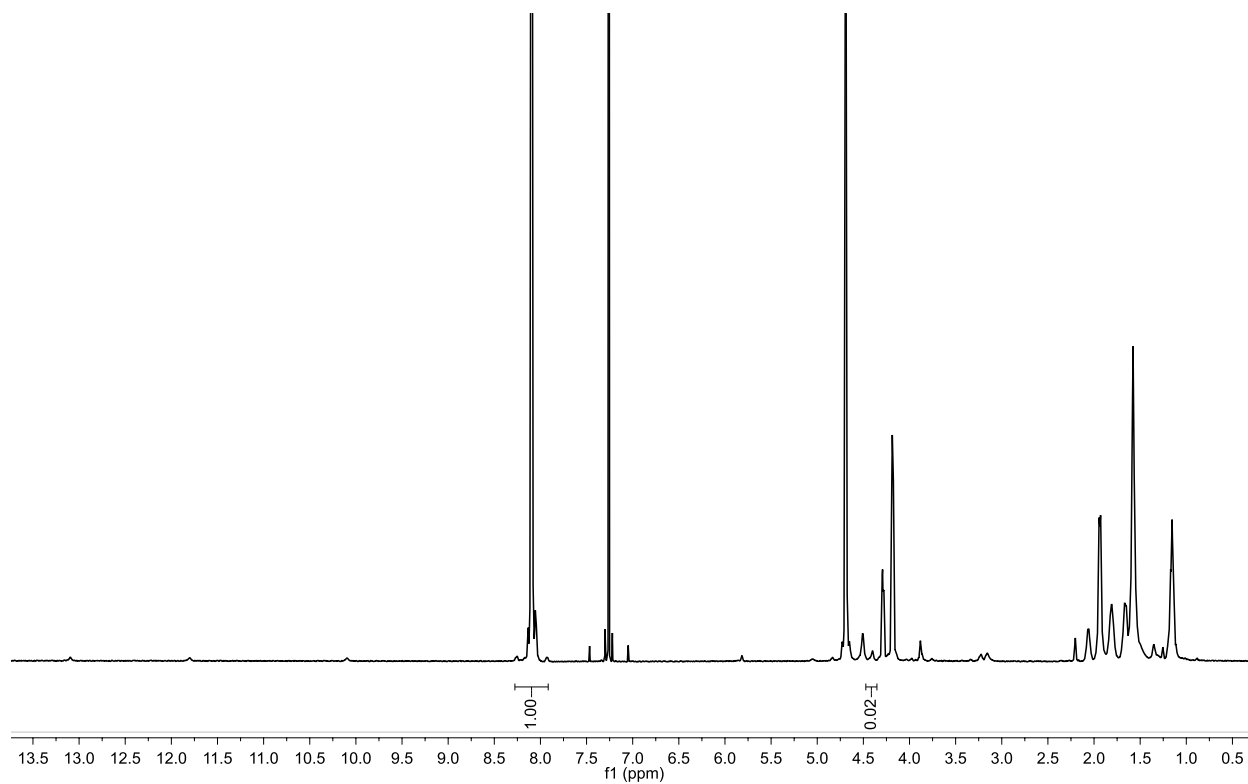

**Figure S10.**  $^1\text{H}$  NMR spectrum of PETG<sub>6.8k</sub> in  $\text{CDCl}_3$  at ambient temperature

## ATR FT-IR Spectra:

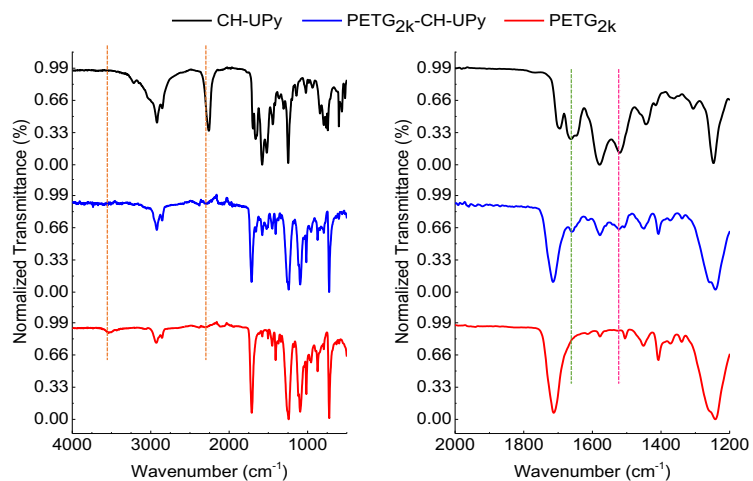

**Figure S11.** ATR FT-IR spectra of CH-UPy, PETG<sub>2k</sub>-CH-UPy, and PETG<sub>2k</sub>. The full spectra, on the left, depict the disappearance of the hydroxyl endgroup of PETG as well as the disappearance of the isocyanate functionality of CH-UPy.

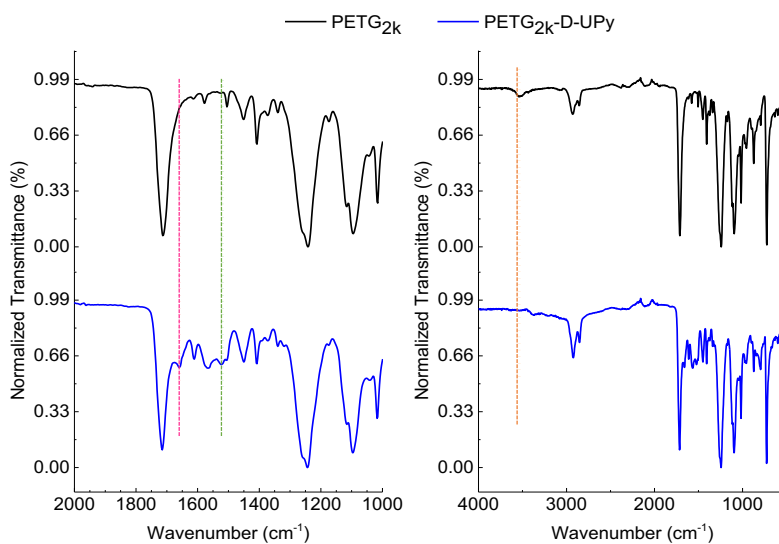

**Figure S12.** ATR FT-IR spectra of PETG<sub>2k</sub>-D-UPy and PETG<sub>2k</sub>. Peaks characteristic of the ureido endgroup are outlined in the spectra on the left. The full spectra, on the right, depict the disappearance of the hydroxyl endgroup of PETG.

## TGA Curves:

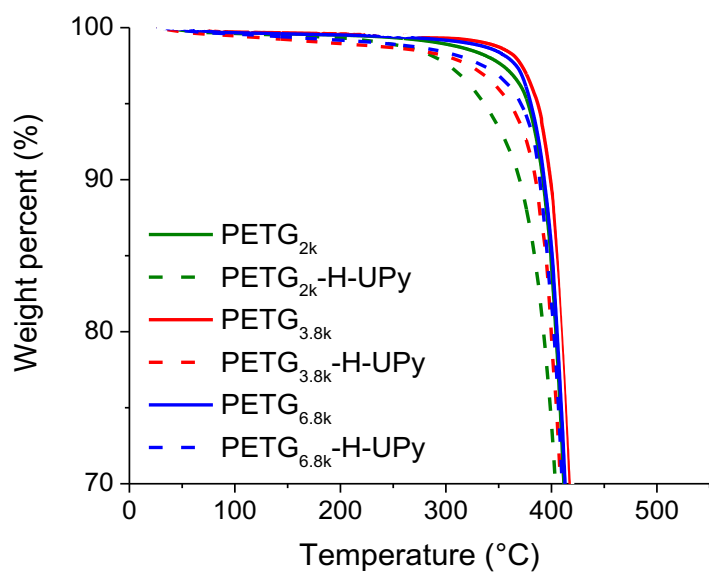

**Figure S13.** TGA Curves of all of the materials.

## GPC Before and After Melt-Processing:

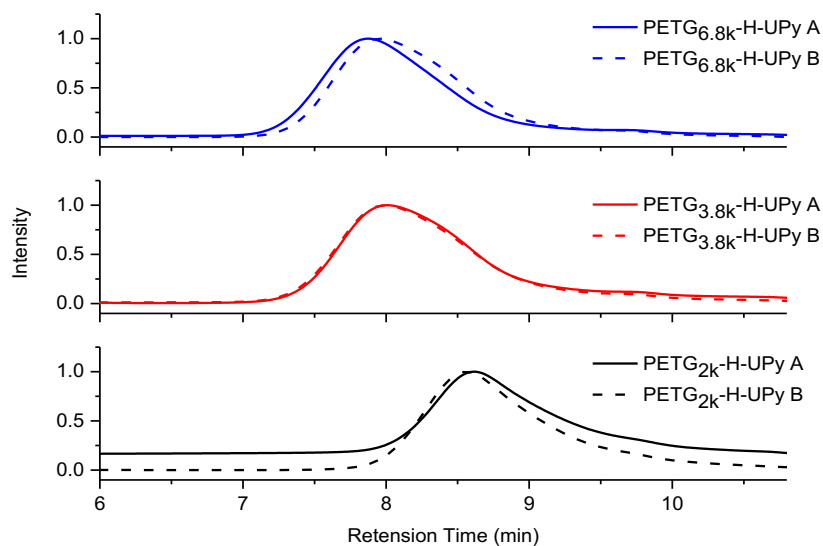

**Figure S14.** GPC traces A) of the raw powder run directly after synthesis, and B) of the melt-pressed materials ( $\text{CHCl}_3$  at 25 °C and  $1.0 \text{ mL min}^{-1}$  using polystyrene standards).

## Dynamic Oscillatory Shear Measurement of the Tan Delta:

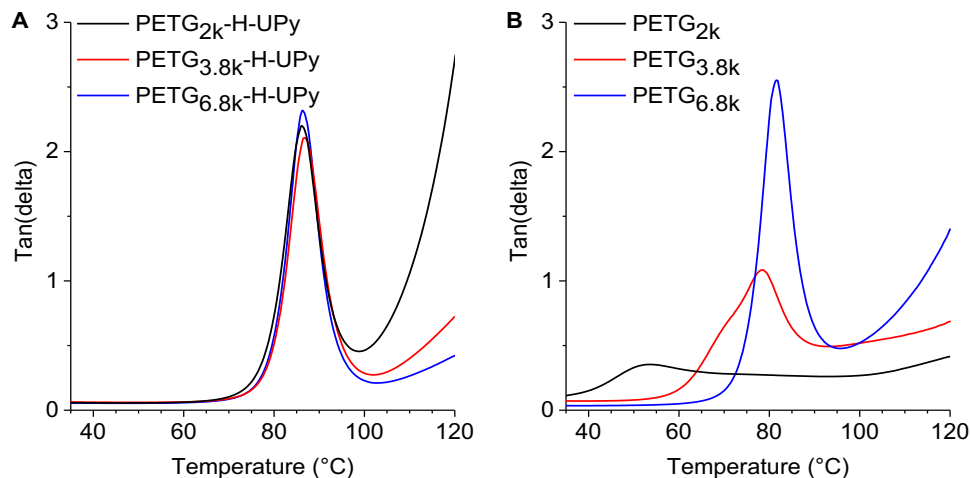

**Figure S15.** Dynamic oscillatory shear measurements of the tan delta as the material goes through cooling and heating cycles, where the peak signifies the  $T_g$  of A) H-UPy functionalized materials and B) unfunctionalized PETG (1 Hz, 0.1% strain, parallel plate fixture with plate diameter of 8 mm and gap length of 1000  $\mu\text{m}$ ).

## AFM:

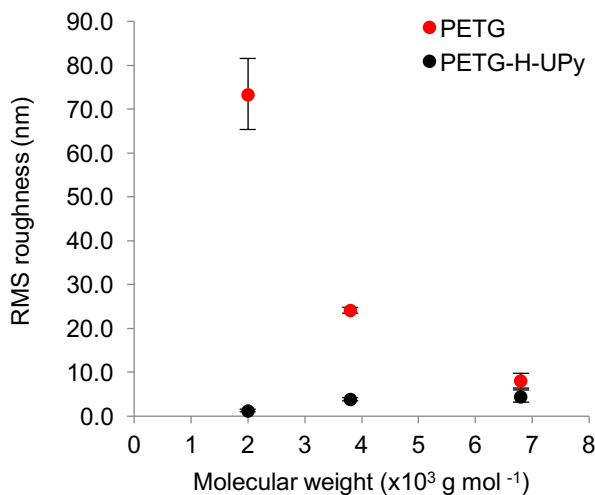

**Figure S16.** RMS surface roughness of PETG before and after H-UPy functionalization. RMS surface roughness obtained from AFM images (20 $\times$ 20  $\mu\text{m}$ ) using Nanoscope 6.14R1 software.

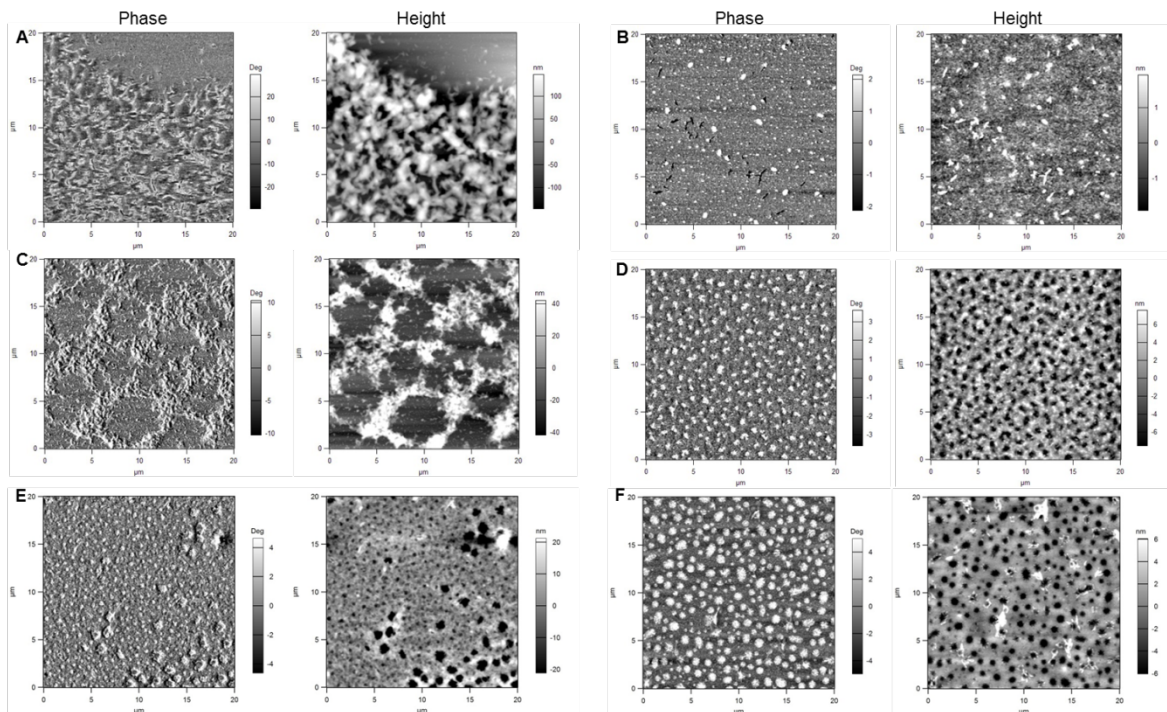

**Figure S17.** AFM 20x20  $\mu\text{m}$  images: A) PETG<sub>2k</sub>, B) PETG<sub>2k</sub>-H-UPy, C) PETG<sub>3.8k</sub>, D) PETG<sub>3.8k</sub>-H-UPy, E) PETG<sub>6.8k</sub>, F) PETG<sub>6.8k</sub>-H-UPy.

### Rheology:

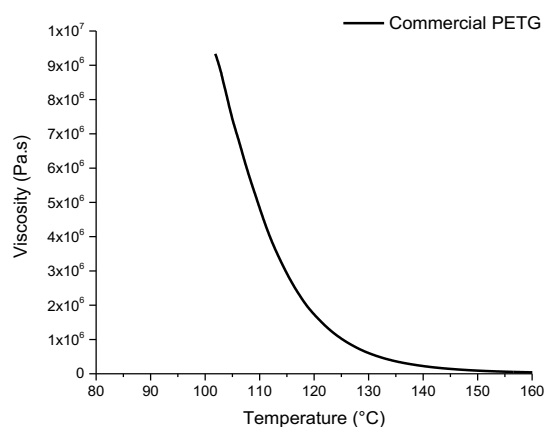

**Figure S18.** Rheological characterization of commercial PETG (shear rate  $0.05 \text{ s}^{-1}$ , parallel plate fixture with plate diameter of 8 mm and gap length of  $1000 \mu\text{m}$ ).



## Variable Temperature $^1\text{H}$ NMR Spectra:

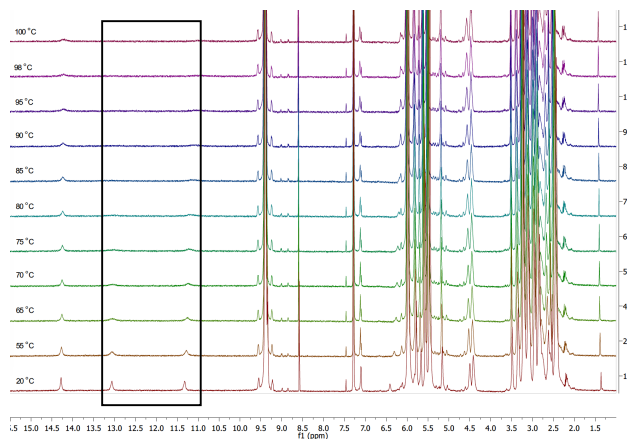

**Figure S19.** Variable temperature  $^1\text{H}$  NMR spectra of PETG<sub>6.8k</sub>-H-UPy in TCE-d<sub>2</sub> ( $c = 5$  mM, 600 s equilibrium allowed at each temperature). The box outlines peaks that signify the presence of intermolecular H-bonding of UPy endgroups.
